# Supplementary material for: Catalytic hydrotreatment of Alcell lignin fractions using a Ru/C catalyst
Source: Royal Society of Chemistry journal article supplement (doi:10.1039/c6cy00523c), 2016-01-01
Supplement: c6cy00523c1.pdf [file c6cy00523c1.pdf]

Supplementary information for:

# Catalytic hydrotreatment of Alcell lignin fractions using a Ru/C catalyst

*Arjan Kloekhorst, Hero Jan Heeres\**

Department of Chemical Engineering, University of Groningen, Nijenborgh 4, 9747 AG

Groningen, the Netherlands.

Number of pages: 4

Number of Figures: 1

Number of Tables: 2

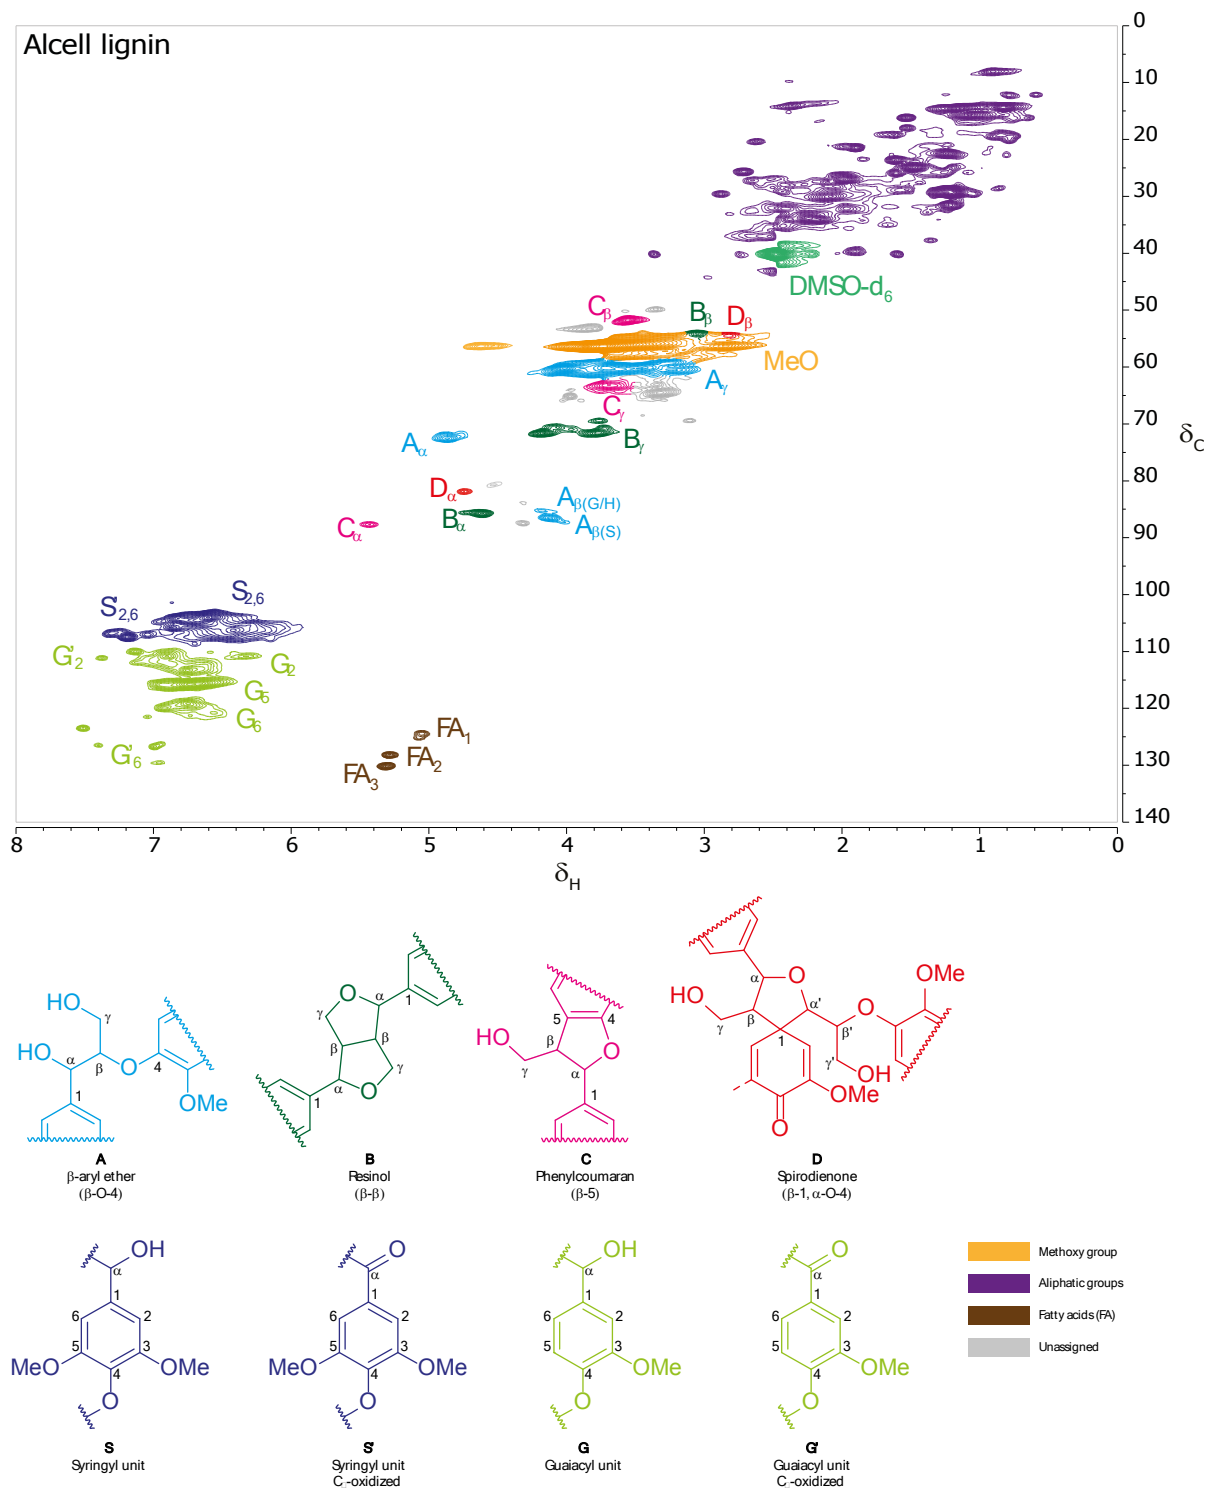

Figure S1. Full HSQC ( $\delta_C$  0-140,  $\delta_H$  0-8 ppm) of Alcell lignin and the fractionated lignins. The contours are colour coded according to the linkage they are assigned to with purple being used for the aliphatic area. Light grey contours are unknown regions.

Table S1. Assignments of  $^{13}\text{C}$ - $^1\text{H}$  cross signals in the gradient HSQC spectra ( $\delta_{\text{C}}$  50-90 ppm) of Alcell lignin.

| Lable                          | $\delta_{\text{C}}/\delta_{\text{H}}$ (ppm) | Assignment                                                                                          |
|--------------------------------|---------------------------------------------|-----------------------------------------------------------------------------------------------------|
| $\text{C}_{\beta}$             | 53.33/3.49                                  | $\text{C}_{\beta}$ - $\text{H}_{\beta}$ in phenylcoumaran ( $\beta$ -5)                             |
| $\text{B}_{\beta}$             | 53.33/3.49                                  | $\text{C}_{\beta}$ - $\text{H}_{\beta}$ in resinol ( $\beta$ - $\beta$ )                            |
| $\text{D}_{\beta}$             | 54.25/2.84                                  | $\text{C}_{\beta}$ - $\text{H}_{\beta}$ in spirodienone substructure ( $\beta$ -1, $\alpha$ -O-4)   |
| OMe                            | 56.17/3.75                                  | C-H in methoxyls ( $\text{OCH}_3$ )                                                                 |
| $\text{A}_{\text{V}}$          | 60.0/3.40-3.80                              | $\text{C}_{\text{V}}$ - $\text{H}_{\text{V}}$ in $\beta$ -aryl ether ( $\beta$ -O-4)                |
| $\text{C}_{\text{V}}$          | 63.2/3.68                                   | $\text{C}_{\text{V}}$ - $\text{H}_{\text{V}}$ in phenylcoumaran ( $\beta$ -5)                       |
| $\text{B}_{\text{V}}$          | 71.4/3.8-4.2                                | $\text{C}_{\text{V}}$ - $\text{H}_{\text{V}}$ in resinol ( $\beta$ - $\beta$ )                      |
| $\text{A}_{\alpha}$            | 72.4/4.90                                   | $\text{C}_{\alpha}$ - $\text{H}_{\alpha}$ in $\beta$ -aryl ether ( $\beta$ -O-4)                    |
| $\text{D}_{\alpha}$            | 81.8/4.76                                   | $\text{C}_{\alpha}$ - $\text{H}_{\alpha}$ in spirodienone substructure ( $\beta$ -1, $\alpha$ -O-4) |
| $\text{A}_{\beta(\text{G/H})}$ | 72.4/4.90                                   | $\text{C}_{\beta}$ - $\text{H}_{\beta}$ in $\beta$ -aryl ether ( $\beta$ -O-4)                      |
| $\text{B}_{\alpha}$            | 85.53/4.63                                  | $\text{C}_{\alpha}$ - $\text{H}_{\alpha}$ in resinol ( $\beta$ - $\beta$ )                          |
| $\text{A}_{\beta(\text{S})}$   | 86.3/4.15                                   | $\text{C}_{\beta}$ - $\text{H}_{\beta}$ in $\beta$ -aryl ether ( $\beta$ -O-4)                      |
| $\text{C}_{\alpha}$            | 87.5/5.44                                   | $\text{C}_{\alpha}$ - $\text{H}_{\alpha}$ in phenylcoumaran ( $\beta$ -5)                           |
| $\text{S}_{2,6}$               | 63.9/6.62                                   | $\text{C}_{2,6}$ - $\text{H}_{2,6}$ in syringyl units (S)                                           |
| $\text{S}'_{2,6}$              | 67.3/7.2                                    | $\text{C}_{2,6}$ - $\text{H}_{2,6}$ in oxidized $\text{C}_{\alpha}$ -oxidized syringyl units (S')   |
| $\text{G}_2$                   | 70.7/6.91                                   | $\text{C}_2$ - $\text{H}_2$ in guaiacyl units (G)                                                   |
| $\text{G}_5$                   | 75.6/6.75                                   | $\text{C}_5$ - $\text{H}_5$ in guaiacyl units (G)                                                   |
| $\text{G}_6$                   | 79.0/6.75                                   | $\text{C}_6$ - $\text{H}_6$ in guaiacyl units (G)                                                   |
| $\text{G}'_6$                  | 83.4/7.5                                    | $\text{C}_6$ - $\text{H}_6$ in oxidized $\text{C}_{\alpha}$ -oxidized guaiacyl units (G')           |
| $\text{FA}_1$                  | 84.3/5.07                                   | Unsaturated bonds in fatty acids                                                                    |
| $\text{FA}_2$                  | 88.0/5.3                                    | Unsaturated bonds in fatty acids                                                                    |
| $\text{FA}_3$                  | 50.0/5.33, 90.0/5.33                        | Unsaturated bonds in fatty acids                                                                    |
| Aliphatic                      | 50-90/3.1-0                                 | Aliphatic chains                                                                                    |

Table S2. Bond dissociation enthalpies (BDE) for lignin linkages.

| Linkage bond                                                                                         | BDE (KJ/mol)                                     | Linkage bond                                                                                      | BDE (KJ/mol)                                       |
|------------------------------------------------------------------------------------------------------|--------------------------------------------------|---------------------------------------------------------------------------------------------------|----------------------------------------------------|
| 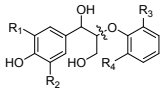<br>$\beta$ -O-5  | $292 \pm 5^{\text{a}}$<br>$281 \pm 1^{\text{b}}$ | <br>$\beta$ -1 | $289 \pm 2^{\text{a}}$                             |
| <br>$\alpha$ -O-4 | $220 \pm 16^{\text{a}}$                          | <br>$\beta$ -5 | $430 \pm 8^{\text{a}}$                             |
| <br>4-O-5         | $332 \pm 7^{\text{b}}$                           | <br>5-5        | $482 \pm 12^{\text{a}}$<br>$488 \pm 12^{\text{b}}$ |

a) Calculated BDE values from Parthasarathi et al.<sup>1</sup>, b) Calculated BDE values from Kim et al.<sup>2</sup>

## References for supplementary information

1 R. Parthasarathi, R. A. Romero, A. Redondo and S. Gnanakaran, *J. Phys. Chem. Lett.*, 2011, **2**, 2660-2666.

2 S. Kim, S. C. Chmely, M. R. Nimos, Y. J. Bomble, T. D. Foust, R. S. Paton and G. T. Beckham, *Journal of Physical Chemistry Letters*, 2011, **2**, 2846-2852.
